# Supplementary material for: Serum Uric Acid to HDL-Cholesterol Ratio is Associated with New-Onset NAFLD in Lean Chinese People with Normal Blood Lipid Levels: a Longitudinal Cohort Study
Source: Research Square preprint supplement (doi:10.21203/rs.3.rs-1117643/v1), 2021-12-02
Supplement: Supplementary file 1 [file 0077bd8413a3a33e8209d7ae.xlsx]

## Sheet: Sheet1
	URH	LDL	RC	LDL-cL/HDL-c	ALB/ALP	NHDL-c/HDL-c	ALT/AST
Female
AUC（95%CI）	0.69(0.66-0.72)	0.64(0.61-0.67)	0.60(0.57-0.63)	0.70(0.67-0.73)	0.61(0.58-0.61)	0.70(0.67-0.73)	0.72(0.69-0.75)
P value	<0.001	<0.001	<0.001	<0.001	<0.001	<0.001	<0.001
Male
AUC（95%CI）	0.65(0.62-0.68)	0.63(0.60-0.66)	0.58(0.54-0.61)	0.67(0.64-0.70)	0.61(0.58-0.64)	0.67(0.64-0.70)	0.68(0.65-0.71)
P value	<0.001	<0.001	<0.001	<0.001	<0.001	<0.001	<0.001
ALT<40
AUC（95%CI）	0.70(0.65-0.69)	0.63(0.61-0.65)	0.59(0.57-0.61)	0.68(0.66-0.70)	0.61(0.58-0.63)	0.68(0.66-0.70)	0.69(0.67-0.71)
P value	<0.001	<0.001	<0.001	<0.001	<0.001	<0.001	<0.001
ALT>40
AUC（95%CI）	0.61(0.54-0.69)	0.61(0.54-0.69)	0.53(0.45-0.61)	0.63(0.55-0.70)	0.53(0.46-0.61)	0.61(0.54-0.68)	0.56(0.48-0.64)
P value	0.007	0.006	0.441	0.002	0.419	0.007	0.159
