# Supplementary material for: Serum Uric Acid to HDL-Cholesterol Ratio is Associated with New-Onset NAFLD in Lean Chinese People with Normal Blood Lipid Levels: a Longitudinal Cohort Study
Source: Research Square preprint supplement (doi:10.21203/rs.3.rs-1117643/v1), 2021-12-02
Supplement: Supplementary file 2 [file 1ba120cc19bb5c25f8453af6.xlsx]

## Sheet: Sheet1
	AUC	95%CI low	95%CI upp	P	Sensitivity	Specificity	Youden index	Cut-off point
LDL	0.630961	0.608855	0.653068	<0.001	0.633	0.588	0.221	2.21
URH	0.667026	0.647127	0.686924	<0.001	0.705	0.573	0.278	179.9
LDL-c/HDL-c	0.679631	0.658585	0.700678	<0.001	0.55	0.711	0.261	1.66
RC	0.58721	0.565365	0.609054	<0.001	0.539	0.58	0.119	0.73
ALB/ALP	0.608336	0.586466	0.630206	<0.001	0.676	0.495	0.171	1.49
NHDL-c/HDL-c	0.679783	0.659304	0.700263	<0.001	0.689	0.561	0.25	1.96
Alt/AST	0.695803	0.675286	0.71632	<0.001	0.62	0.704	0.324	0.86
