# Supplementary material for: Serum Uric Acid to HDL-Cholesterol Ratio is Associated with New-Onset NAFLD in Lean Chinese People with Normal Blood Lipid Levels: a Longitudinal Cohort Study
Source: Research Square preprint supplement (doi:10.21203/rs.3.rs-1117643/v1), 2021-12-02
Supplement: Supplementary file 3 [file 47c8cfd77c391f4ba7efaa0c.xlsx]

## Sheet: Sheet1
charactristics	Quartiles of URH					P value
	Q1(≤120.88)	Q2(120.89-154.01)	Q3(154.02-189.91)	Q4(189.92-240.46)	Q5（≥240.47）
Gender, male/female (n)	902/1065	924/1045	957/1009	882/1086	831/1136	<0.001
age(years)	41.83±12.27	41.99±14.58	42.29±14.66	43.16±15.09	43±14.87	0.011
nafld(%)	47(2.4%)	98(5%)	156(7.9%)	203(10.3%)	351(17.8%)	<0.001
ALP(U/L)	58.00（49.00-69.00）	62.00（52.00-76.00）	68.00（56.00-82.00）	71.00（60.00-85.00）	74.00（62.00-87.00）	<0.001
GGT(U/L)	16.00（13.00-20.00）	17.00（14.00-22.00）	20.00（16.00-27.00）	22.00（17.00-29.00）	23.00（18.00-33.00）	<0.001
ALT(U/L)	13.00（11.00-17.00）	14.00（11.00-19.00）	15.00（12.00-21.00）	17.00（12.00-22.00）	18.00（13.00-24.00）	<0.001
AST(U/L)	19.00（17.00-22 .00）	20.00（17.00-23.00）	21.00（18.00-24.00）	21.00（18.00-25.00）	22.00（19.00-26.00）	<0.001
TP(g/L)	73.28±4.07	73.58±3.99	73.83±4.04	74.04±4.12	74.18±4.22	<0.001
ALB(g/L)	43.87±2.72	44.09±2.60	44.38±2.83	44.61±2.73	44.73±2.80	<0.001
GLB(g/L)	29.44±3.69	29.57±3.70	29.53±3.93	29.47±3.82	29.49±4.18	<0.001
TB(μmol/L)	11.00（8.00-14.00）	11.00（9.00-14.00）	11.00（9.00-14.00）	12.00（9.00-16.00）	12.00（10.00-16.00）	<0.001
BUN(mmol/L)	4.20 (3.50–5.05)	4.20 (3.50–5.10)	4.30 (3.51–5.10)	4.40 (3.60–5.26)	4.40 (3.70–5.30)	<0.001
Cr(μmol/L)	66.00（59.00-72.00）	68.00（60.50-76.00）	72.00（62.00-86.00）	83.00（68.00-95.00）	90.00（79.00-101.00）	<0.001
UA(mmol/L)	176.34±34.98	221.96±35.03	254.95±42.10	296.73±46.36	369.55±61.84	<0.001
GLU(mmol/L)	4.97±0.58	5.02±0.70	5.08±0.82	5.12±0.73	5.17±0.64	<0.001
TC(mmol/L)	4.39±0.51	4.35±0.51	4.36±0.54	4.33±0.54	4.27±0.54	<0.001
TG(mmol/L)	0.81±0.25	0.89±0.28	0.96±0.30	1.05±0.31	1.13±0.30	<0.001
HDL-c(mmol/L)	1.79（1.62-1.99）	1.60（1.45-1.78）	1.41（1.31-1.65）	1.37（1.24-1.52）	1.23（1.13-1.36）	<0.001
LDL-c(mmol/L)	1.99（1.71-2.27）	2.07（1.81-2.35）	2.17（1.88-2.43）	2.19（1.90-2.46）	2.25（1.94-2.52）	<0.001
Height(m)	160.53±5.49	161.56±6.58	163.73±7.44	166.66±7.69	169.21±7.26	<0.001
Weight(Kg)	52.04±5.85	53.76±6.81	56.36±7.77	59.33±7.93	63.01±7.99	<0.001
BMI(kg/m2)	20.10（18.87-21.52）	20.53（19.27-21.94）	21.04（19.56-22.46）	21.41（19.86-22.88）	22.21（20.66-23.59）	<0.001
SBP(mmHg)	112.00（103.00-120.00）	113.00（104.00-122.00）	116.00（106.00-127.00）	119.00（109.00-131.00）	122.00（113.00-134.00）	<0.001
DBP(mmHg)	68.00（62.00-74.00）	68.00（62.00-75.00）	70.00（64.00-78.00）	72.00（65.00-80.00）	73.00（67.00-85.25）	<0.001
