# Supplementary material for: Serum Uric Acid to HDL-Cholesterol Ratio is Associated with New-Onset NAFLD in Lean Chinese People with Normal Blood Lipid Levels: a Longitudinal Cohort Study
Source: Research Square preprint supplement (doi:10.21203/rs.3.rs-1117643/v1), 2021-12-02
Supplement: Supplementary file 4 [file adbd132344cd180a5810d643.xlsx]

## Sheet: Sheet1
Group	Model 1	Model 2	Model 3	Model 4
Q1	1	1	1	1
Q2	1.96（1.38-2.77）	1.95(1.39-2.76)	2.27(1.44-3.58)	1.33(0.84-2.11)
Q3	2.83（2.04-3.92）	2.82(2.03-3.91)	3.70(2.43-5.66)	1.66(1.07-2.58)
Q4	3.72（2.71-8.83）	3.69(2.69-5.07)	4.67(3.10-7.05)	1.67(1.08-2.59)
Q5	6.51（4.80-8.83）	6.46(4.76-9.76)	6.53(4.38-9.76)	1.76(1.12-2.75)
P value	< 0.001	< 0.001	< 0.001	< 0.001
